# Supplementary material
Source: Springer Nature journal article supplement (https://www.springermedizin.de/resource/supplementary/13054_2013_2600_MOESM1_ESM.pdf/9714432)

a

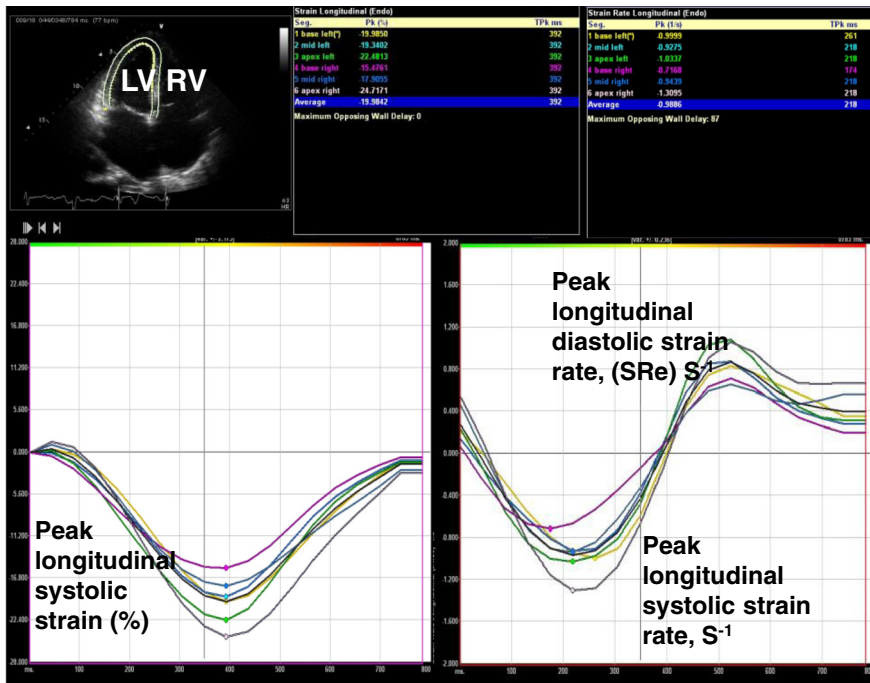

b

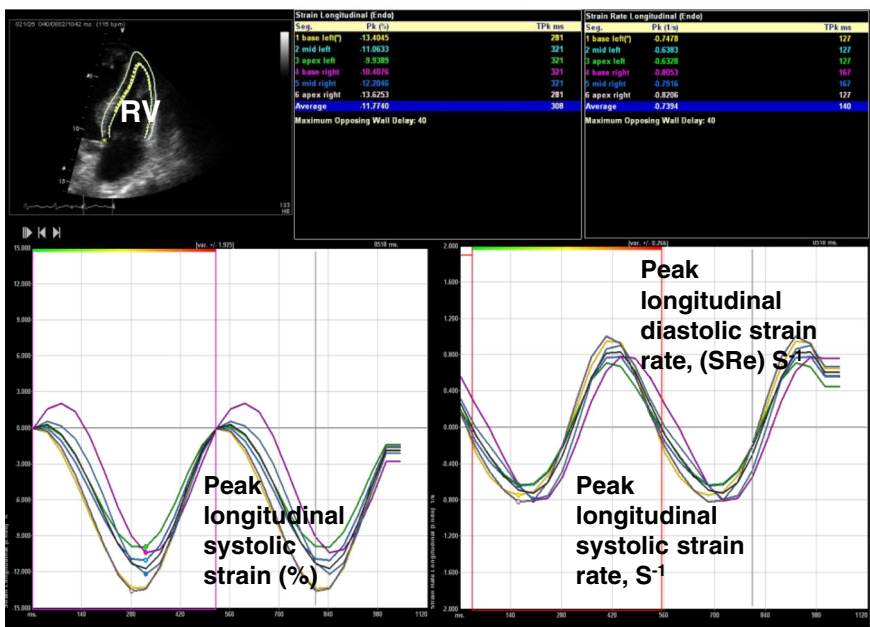

Supplement: MOESM1 [file 9714432]
